# Supplementary material
Source: PubMed Central journal article supplement (PMC3370638)
Supplement: supp_194.11.2819_FigS1.pdf [file supp_194.11.2819_FigS1.pdf]

Figure S1

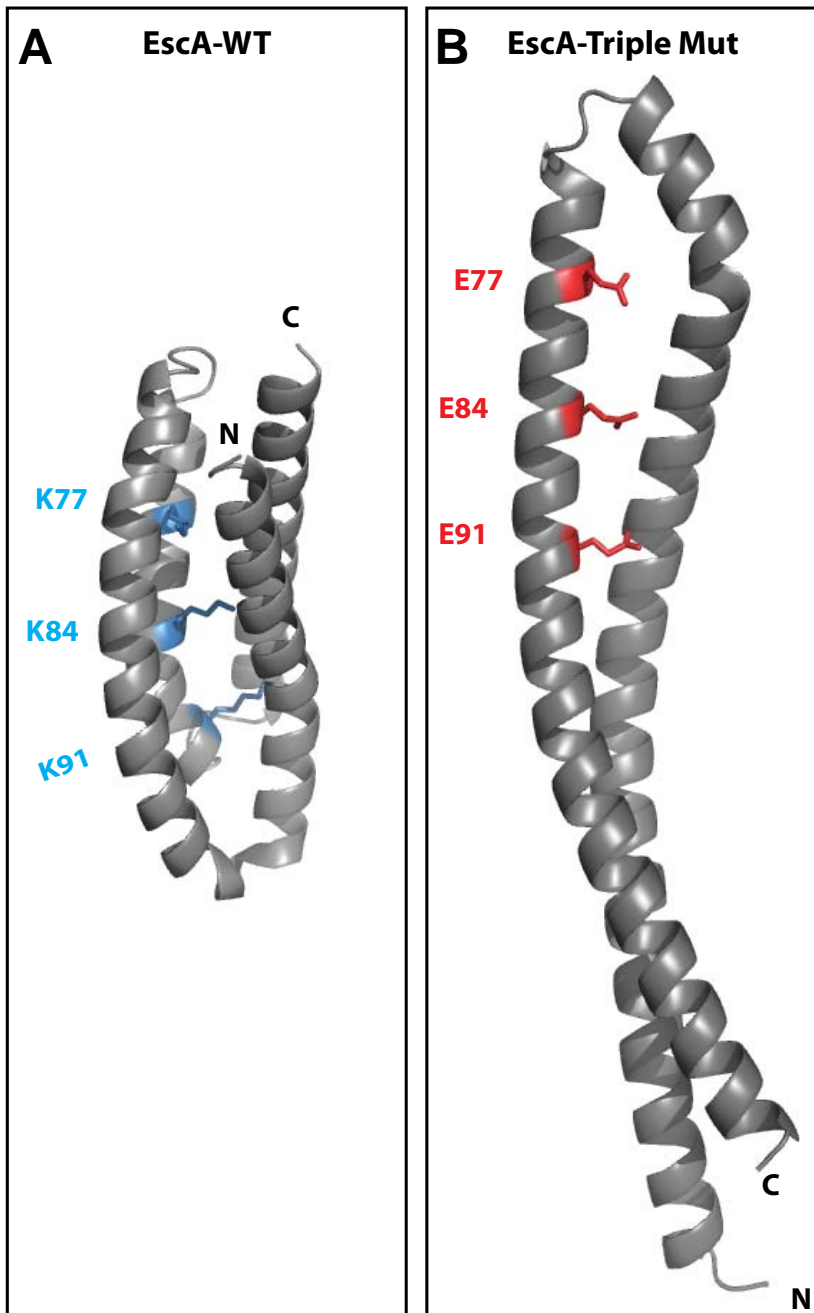

Figure S1: **Tertiary structure prediction of the EscA protein.** (A) I-TASSER predictions of WT EscA. The structure with the best confidence score is presented (-1.73). Lysines in positions 77, 84 and 91 are marked in blue to highlight their involvement in stabilizing the 4-helices of the coiled coil structure. (B) The structure with

the best confidence score (-1.28) for the EscA triple mutant as analyzed by the I-TASSER software. Lysines to glutamic acid mutations are highlighted in red.
